# Supplementary material for: Dual Hyaluronic Acid and Folic Acid Targeting pH-Sensitive Multifunctional 2DG@DCA@MgO-Nano-Core–Shell-Radiosensitizer for Breast Cancer Therapy
Source: MDPI journal article supplement (doi:10.3390/cancers13215571), 2021-11-07
Supplement: s1 [file s1]

# Supplementary Materials: Dual Hyaluronic Acid and Folic Acid Targeting pH-Sensitive Multifunctional 2DG@DCA@MgO-Nano-Core-Shell-Radiosensitizer for Breast Cancer Therapy

Mostafa A. Askar, Noura M. Thabet, Gharieb S. El-Sayyad, Ahmed I. El-Batal, Mohamed Abd El kodous, Omama E. El Shawi, Hamed Helal and Mohamed K. Abdel-Rafei

Figure 6f

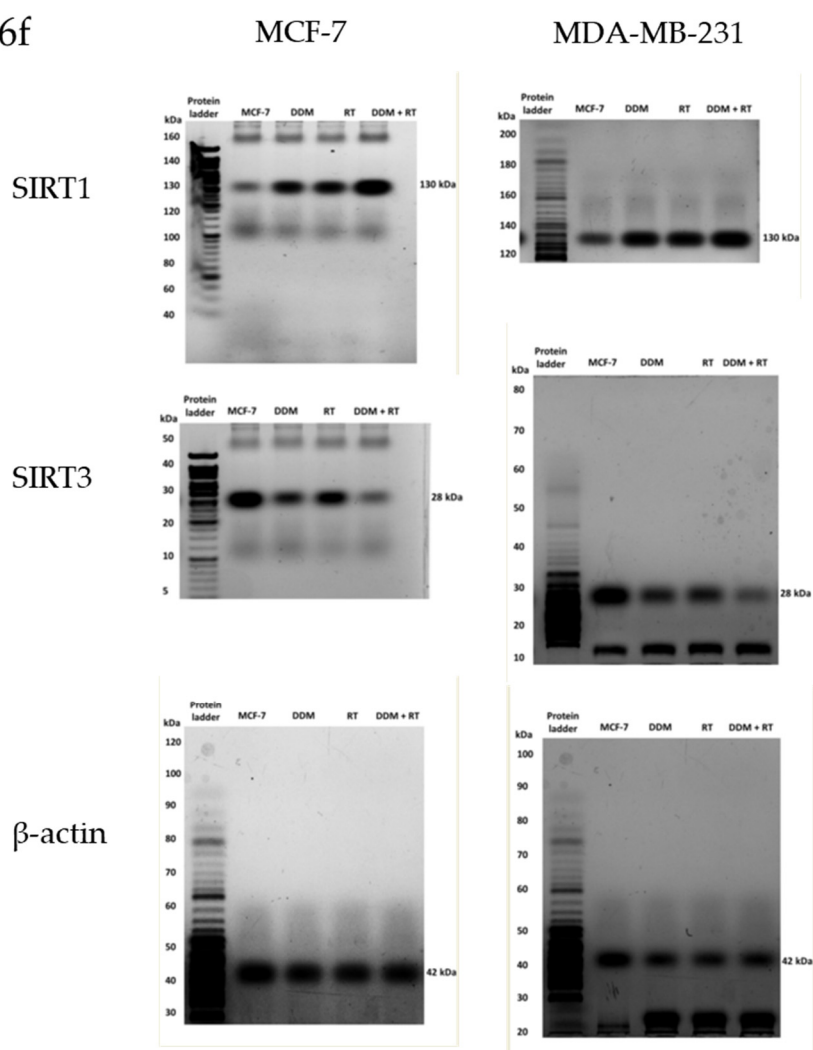

Figure 7a

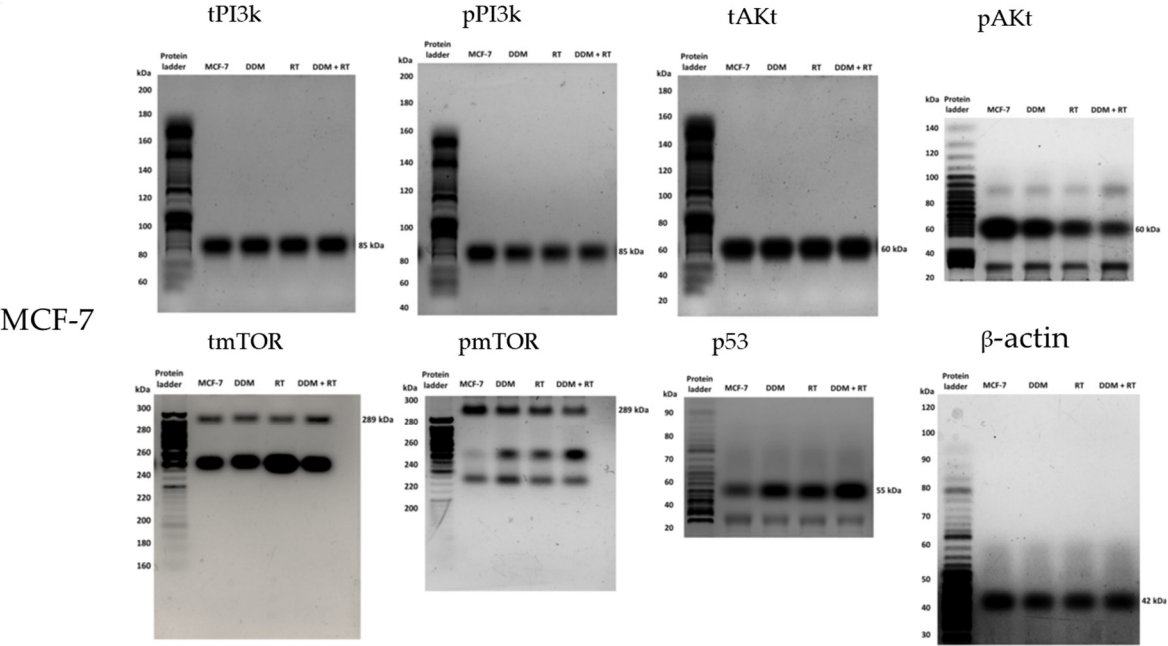

Figure 7d

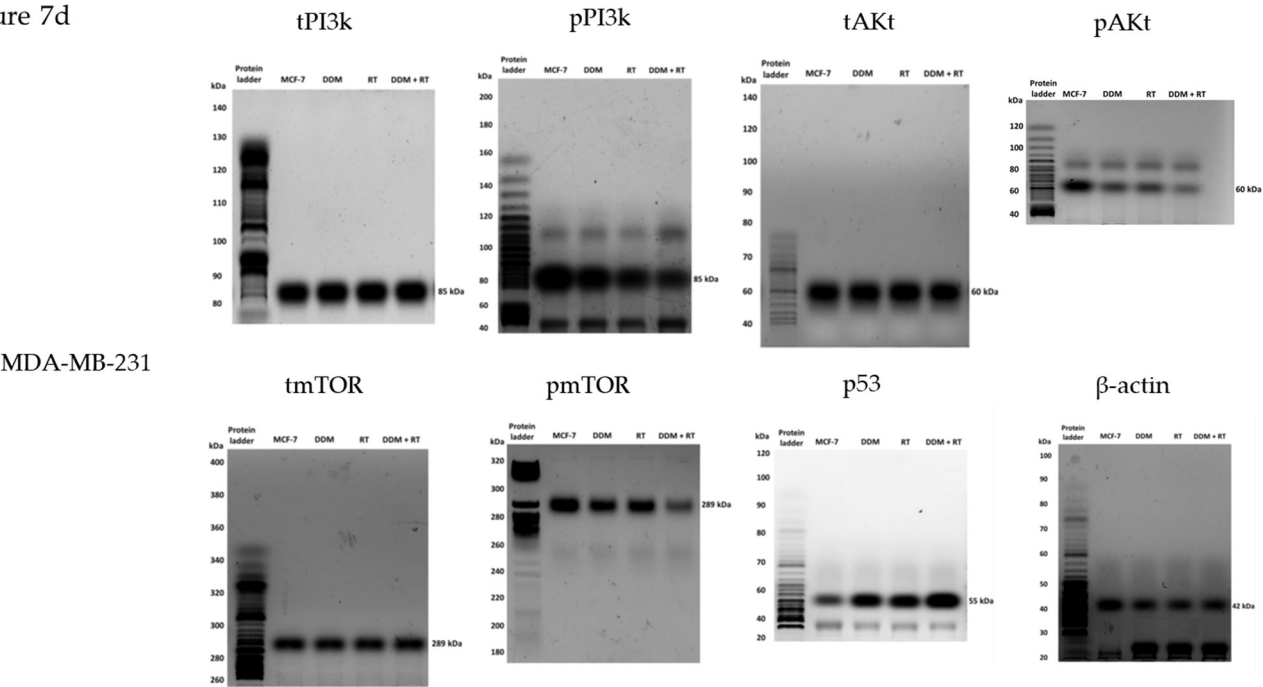

Figure S1. The uncropped Western blots.
